# Supplementary material for: A Longitudinal Study of the Impact of Technical Training on Dental Hygienists' Occupational Stress
Source: Research Square preprint supplement (doi:10.21203/rs.3.rs-6936430/v1), 2025-07-18
Supplement: Supplementary file 1 [file 5ae9823acbfb37c9caddae2f.pdf]

Additional File 2. Attributes of non-research subjects

|                                                  |                                                 | n         | (%)     |
|--------------------------------------------------|-------------------------------------------------|-----------|---------|
| <b>Sex</b>                                       | Male                                            | 0         | (0.0)   |
|                                                  | Female                                          | 88        | (100.0) |
| <b>Age</b>                                       | Mean (SD)                                       | 32.1±11.1 |         |
|                                                  | 20s (20–29)                                     | 50        | (56.8)  |
|                                                  | 30s (30–39)                                     | 15        | (17.0)  |
|                                                  | 40s (40–49)                                     | 13        | (14.8)  |
|                                                  | 50s (50–59)                                     | 10        | (11.4)  |
| <b>Employment status</b>                         | Full-time (Permanent) Employee                  | 46        | (52.3)  |
|                                                  | Full-time (Non-permanent) Employee              | 4         | (4.5)   |
|                                                  | Part-time Employee                              | 19        | (21.6)  |
|                                                  | Non-dental hygienist roles                      | 7         |         |
|                                                  | Unemployed                                      | 12        |         |
| <b>Current Workplace</b>                         | Dental Clinic                                   | 62        | (89.9)  |
|                                                  | Hospital/University Hospital                    | 6         | (8.7)   |
|                                                  | Long-term Care Welfare Facility for the Elderly | 1         | (1.4)   |
|                                                  |                                                 |           |         |
| <b>Program Enrollment Year</b>                   | 2019                                            | 26        | (29.5)  |
|                                                  | 2020                                            | 21        | (23.9)  |
|                                                  | 2021                                            | 41        | (46.6)  |
| <b>Years of Experience as a Dental Hygienist</b> | <1 year                                         | 21        | (23.9)  |
|                                                  | 1–5 years                                       | 33        | (37.5)  |
|                                                  | 6–10 years                                      | 20        | (22.7)  |
|                                                  | 11–15 years                                     | 3         | (3.4)   |
|                                                  | 16–20 years                                     | 5         | (5.7)   |
|                                                  | >20 years                                       | 6         | (6.8)   |
| <b>Educational Background</b>                    | Dental Hygienist Vocational School              | 69        | (78.4)  |
|                                                  | Junior College                                  | 9         | (10.2)  |
|                                                  | University                                      | 8         | (9.1)   |
|                                                  | Master's Degree                                 | 1         | (1.1)   |
|                                                  | Doctoral Degree                                 | 1         | (1.1)   |
