# Supplementary material for: A Longitudinal Study of the Impact of Technical Training on Dental Hygienists' Occupational Stress
Source: Research Square preprint supplement (doi:10.21203/rs.3.rs-6936430/v1), 2025-07-18
Supplement: Supplementary file 2 [file 69793ea65e34071eaf7ac479.pdf]

Table 2. Analysis of overall occupational stress

| Variable            | Survey Date               | Total<br>N=53 |      | Friedman Test Pairwise<br>Comparisons Sig.     |                                             |                                       |                                                              |                                                        |                                                     |  |
|---------------------|---------------------------|---------------|------|------------------------------------------------|---------------------------------------------|---------------------------------------|--------------------------------------------------------------|--------------------------------------------------------|-----------------------------------------------------|--|
|                     |                           | Mean          | SD   | Pre-training-<br>Immediately post-<br>training | Pre-training-<br>3 months post-<br>training | Pre-training-<br>1 year post-training | Immediately post-<br>training-<br>3 months post-<br>training | Immediately post-<br>training-<br>1 year post-training | 3 months post-<br>training-<br>1 year post-training |  |
| Job control         | Pre-training              | 7.08          | 2.29 | 0.31                                           | 0.04 ↓                                      | 0.23                                  |                                                              |                                                        | 1                                                   |  |
|                     | Immediately post-training | 7.51          | 2.19 |                                                |                                             |                                       | 0.784                                                        |                                                        |                                                     |  |
|                     | 3 months post-training    | 8.00          | 2.10 |                                                |                                             |                                       |                                                              |                                                        | 1                                                   |  |
|                     | 1 year post-training      | 7.70          | 2.33 |                                                |                                             |                                       |                                                              |                                                        |                                                     |  |
| Anger-irritability  | Pre-training              | 5.96          | 2.01 | 1.00                                           | 1.000                                       | 0.01 ↑                                |                                                              |                                                        |                                                     |  |
|                     | Immediately post-training | 5.60          | 2.02 |                                                |                                             |                                       | 1.00                                                         |                                                        |                                                     |  |
|                     | 3 months post-training    | 5.91          | 2.42 |                                                |                                             |                                       | 0.001 ↑                                                      |                                                        | 0.006                                               |  |
|                     | 1 year post-training      | 7.11          | 2.55 |                                                |                                             |                                       |                                                              |                                                        |                                                     |  |
| Fatigue             | Pre-training              | 7.06          | 2.60 | 0.73                                           | 1.000                                       | 0.38                                  |                                                              |                                                        |                                                     |  |
|                     | Immediately post-training | 6.43          | 2.46 |                                                |                                             |                                       | 1.00                                                         |                                                        |                                                     |  |
|                     | 3 months post-training    | 6.51          | 2.41 |                                                |                                             |                                       | 0.004 ↑                                                      |                                                        | 0.001 ↑                                             |  |
|                     | 1 year post-training      | 7.75          | 2.25 |                                                |                                             |                                       |                                                              |                                                        |                                                     |  |
| Anxiety             | Pre-training              | 7.00          | 2.32 | 0.003 ↓                                        | 0.100                                       | 1.000                                 |                                                              |                                                        |                                                     |  |
|                     | Immediately post-training | 5.75          | 2.25 |                                                |                                             |                                       | 1.00                                                         |                                                        |                                                     |  |
|                     | 3 months post-training    | 6.02          | 2.21 |                                                |                                             |                                       | 0.07                                                         |                                                        | 0.23                                                |  |
|                     | 1 year post-training      | 6.75          | 2.06 |                                                |                                             |                                       |                                                              |                                                        |                                                     |  |
| Depression          | Pre-training              | 10.21         | 4.18 | 1.00                                           | 1.00                                        | 0.08                                  |                                                              |                                                        |                                                     |  |
|                     | Immediately post-training | 9.94          | 4.02 |                                                |                                             |                                       | 1.00                                                         |                                                        |                                                     |  |
|                     | 3 months post-training    | 10.08         | 3.70 |                                                |                                             |                                       | 0.04 ↑                                                       |                                                        | 0.03 ↑                                              |  |
|                     | 1 year post-training      | 11.77         | 3.90 |                                                |                                             |                                       |                                                              |                                                        |                                                     |  |
| Physical complaints | Pre-training              | 18.51         | 5.93 | 1.00                                           | 1.00                                        | 0.05                                  |                                                              |                                                        |                                                     |  |
|                     | Immediately post-training | 19.08         | 6.75 |                                                |                                             |                                       | 1.00                                                         |                                                        |                                                     |  |
|                     | 3 months post-training    | 18.26         | 5.98 |                                                |                                             |                                       | 0.35                                                         |                                                        | 0.006 ↑                                             |  |
|                     | 1 year post-training      | 20.77         | 5.47 |                                                |                                             |                                       |                                                              |                                                        |                                                     |  |

**Note.** The upward arrow ( ↑ ) represents a trend toward increased stress levels, while the downward arrow ( ↓ ) denotes a trend toward decreased stress levels, as assessed using the Bonferroni multiple comparisons test.
