# Supplementary material for: A Longitudinal Study of the Impact of Technical Training on Dental Hygienists' Occupational Stress
Source: Research Square preprint supplement (doi:10.21203/rs.3.rs-6936430/v1), 2025-07-18

# Impact of Technical Training on Dental Hygienists' Occupational Stress Over Time

Yuko Kurawaki, Reiko Aimi, Keiko Misumi, Atsue Matsumoto, Mizuki Mitsui, Mayuka Asaeda, Rumi Nishimura, Toshinobu Takemoto, Mariko Naito

## Aim

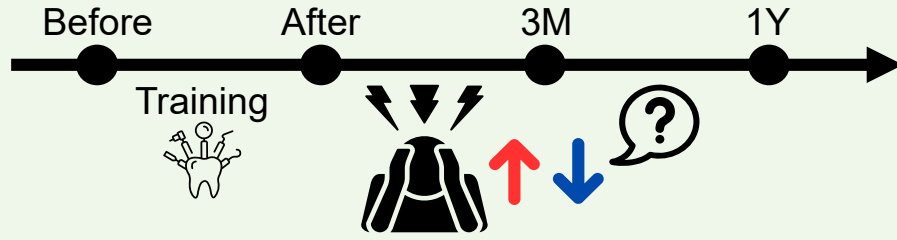

- To evaluate how training programs affect dental hygienists' occupational stress over time
- To determine effectiveness of training programs for reducing work-related stress

## Method

Participants : **53** employed **dental hygienists**  
(from initial 141)

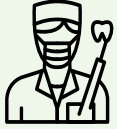

Design : Longitudinal assessment at 4 time points

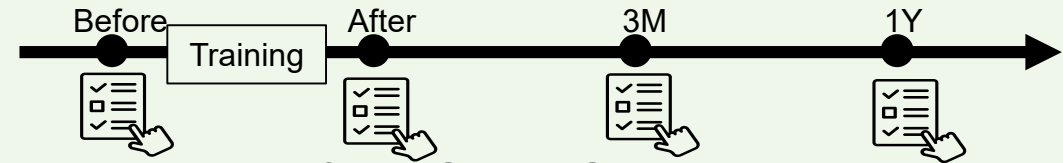

Measures : **Brief Job Stress Questionnaire**

Self-assessed

**Knowledge/Skills/Motivation/Growth mindset**

## Results

### Short-Term (0-3months)

- ✓ ↑ Knowledge and skills
  - ✓ ↑ Job control
  - ✓ ↓ Anxiety
  - ✓ Clinical practice participants:  
↓ Fatigue and anxiety
- 
- 

### Long-Term (1-year)

- ✓ ↑ Stress indicators  
(Anger, Fatigue, Anxiety, Depression)
- ✓ Clinical practice participants:  
↑ Interpersonal conflict in clinical practice group

## Implications for Education

- Training effectively reduces occupational stress short-term
- Sustainable outcomes require:
  - ▮ Improved working conditions
  - ▮ Ongoing professional development
  - ▮ Regular follow-up systems

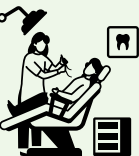

Supplement: Supplementary file 4 [file acfd85e2b19da83907e4bfb0.pdf]
