# Supplementary material for: A Longitudinal Study of the Impact of Technical Training on Dental Hygienists' Occupational Stress
Source: Research Square preprint supplement (doi:10.21203/rs.3.rs-6936430/v1), 2025-07-18
Supplement: Supplementary file 5 [file f758abd0952f65dcee7cedaa.pdf]

Table 3 Impact of Clinical Practice on Occupational Stress Changes

|                                                                                    | Change in Occupational Stress (mean±SD) |                                 | <i>p</i> | Stress |
|------------------------------------------------------------------------------------|-----------------------------------------|---------------------------------|----------|--------|
|                                                                                    | The clinical practice group             | The non-clinical practice group |          |        |
| <b>n</b>                                                                           | 18                                      | 35                              |          |        |
| <b>Poor physical environment<br/>(Immediately post-training - Pre-training)</b>    | 0.59±0.30                               | -0.19±0.21                      | 0.039    | ↑      |
| <b>Fatigue<br/>(Immediately post-training - Pre-training)</b>                      | -1.77±0.66                              | 0.04±0.47                       | 0.041    | ↓      |
| <b>Anxiety<br/>(Immediately post-training - Pre-training)</b>                      | -2.23±0.58                              | -0.74±0.41                      | 0.042    | ↓      |
| <b>Support from family and friends<br/>(3 months post-training - Pre-training)</b> | 0.89±0.51                               | -0.63±0.361                     | 0.021    | ↓      |
| <b>Interpersonal conflict<br/>(1 year post-training - Pre-training)</b>            | 1.24±0.50                               | -0.32±0.35                      | 0.015    | ↑      |
| <b>Vigor<br/>(1 year post-training - Pre-training)</b>                             | -0.69±0.58                              | 1.33±0.41                       | 0.007    | ↓      |

Note. The upward arrow ( ↑ ) represents a trend toward increased stress levels, while the downward arrow ( ↓ ) denotes a trend toward decreased stress levels, as assessed using Bonferroni multiple comparisons test.
